# Supplementary figures and images for: Increased mitochondrial NADPH oxidase 4 (NOX4) expression in aging is a causative factor in aortic stiffening
Source: PubMed Central journal article supplement — Redox Biol. 2019 Aug 2;26:101288. doi: 10.1016/j.redox.2019.101288 (PMC6831838; doi:10.1016/j.redox.2019.101288), 2019-08-02

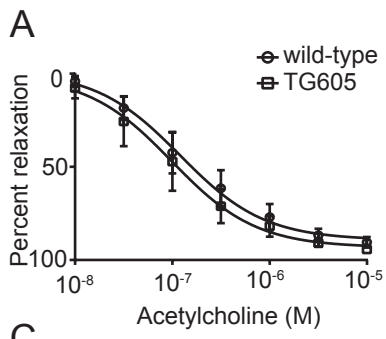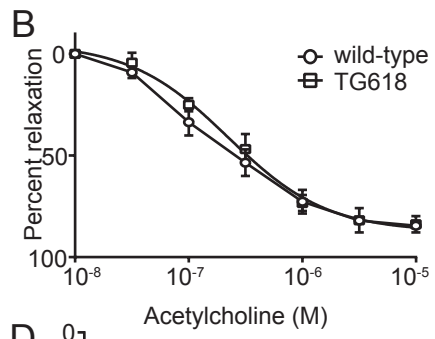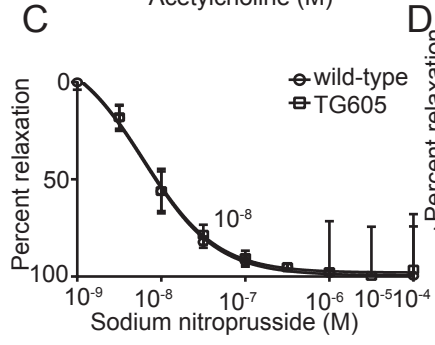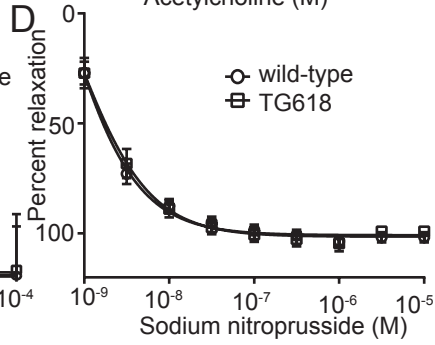

Supplement: mmc2.pdf [file mmc2.pdf]

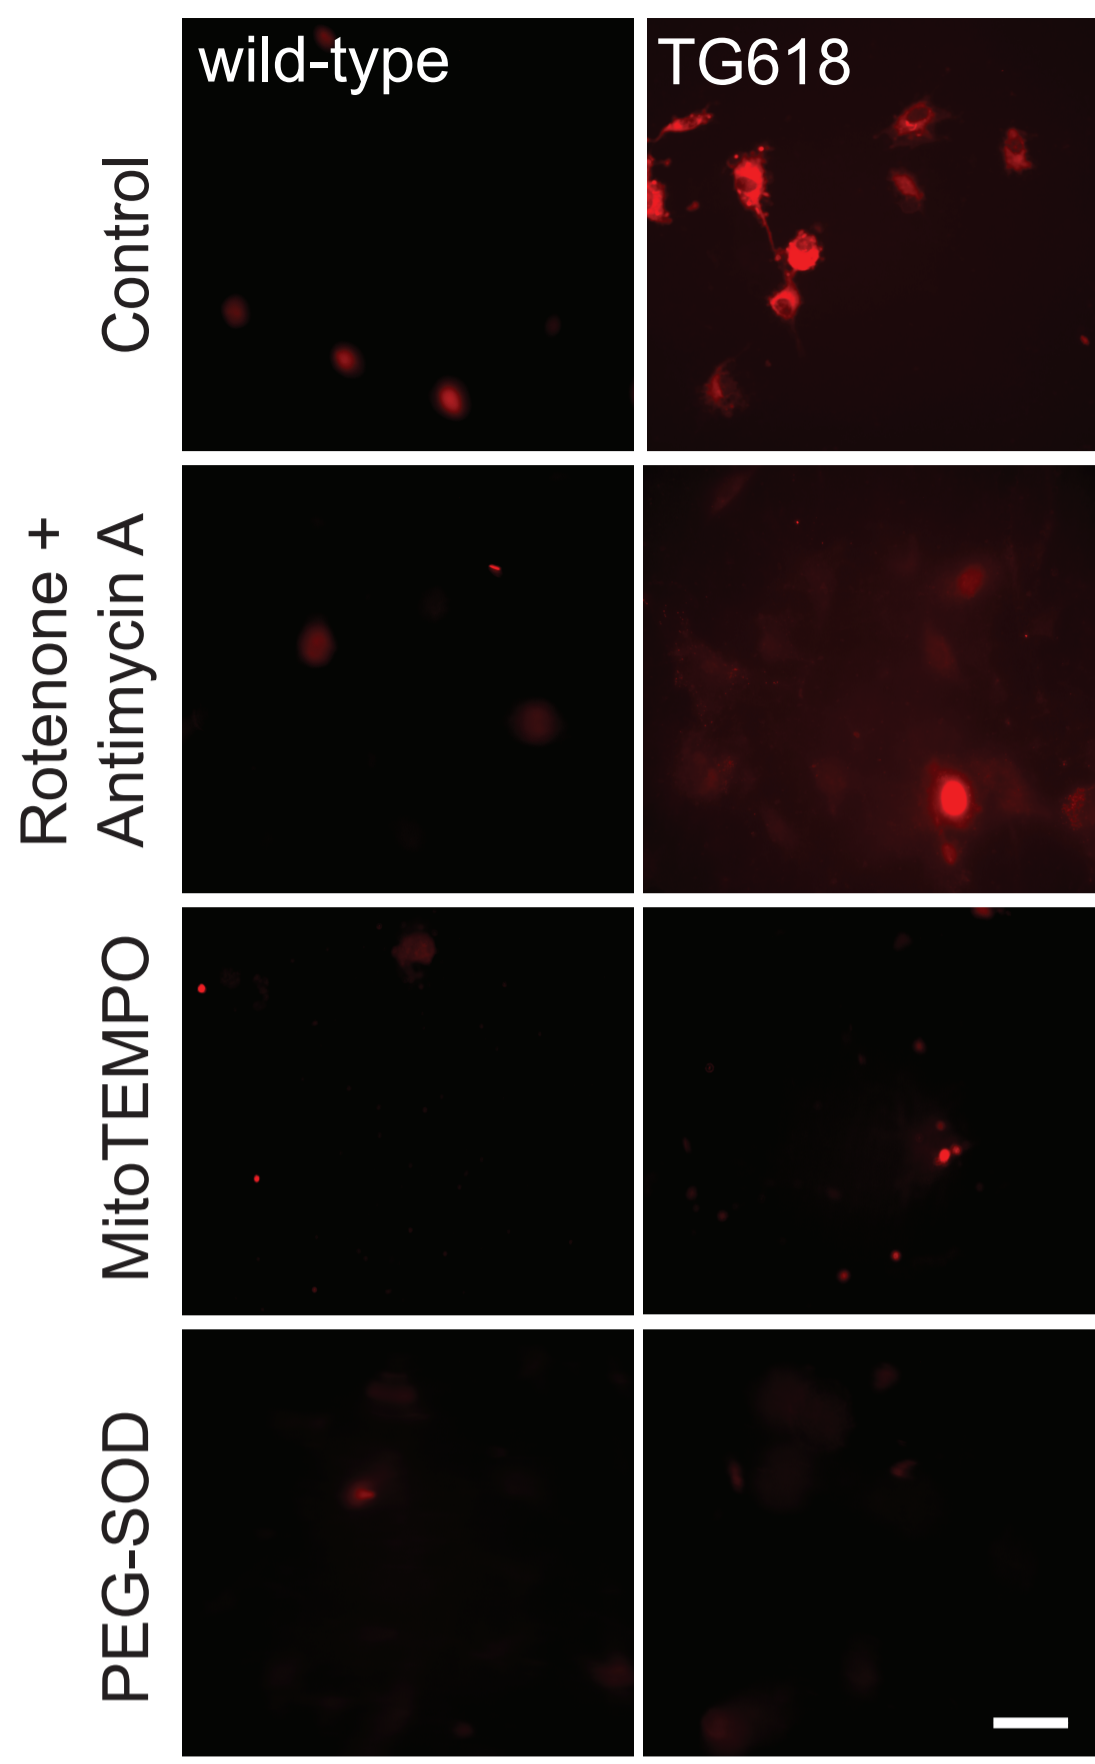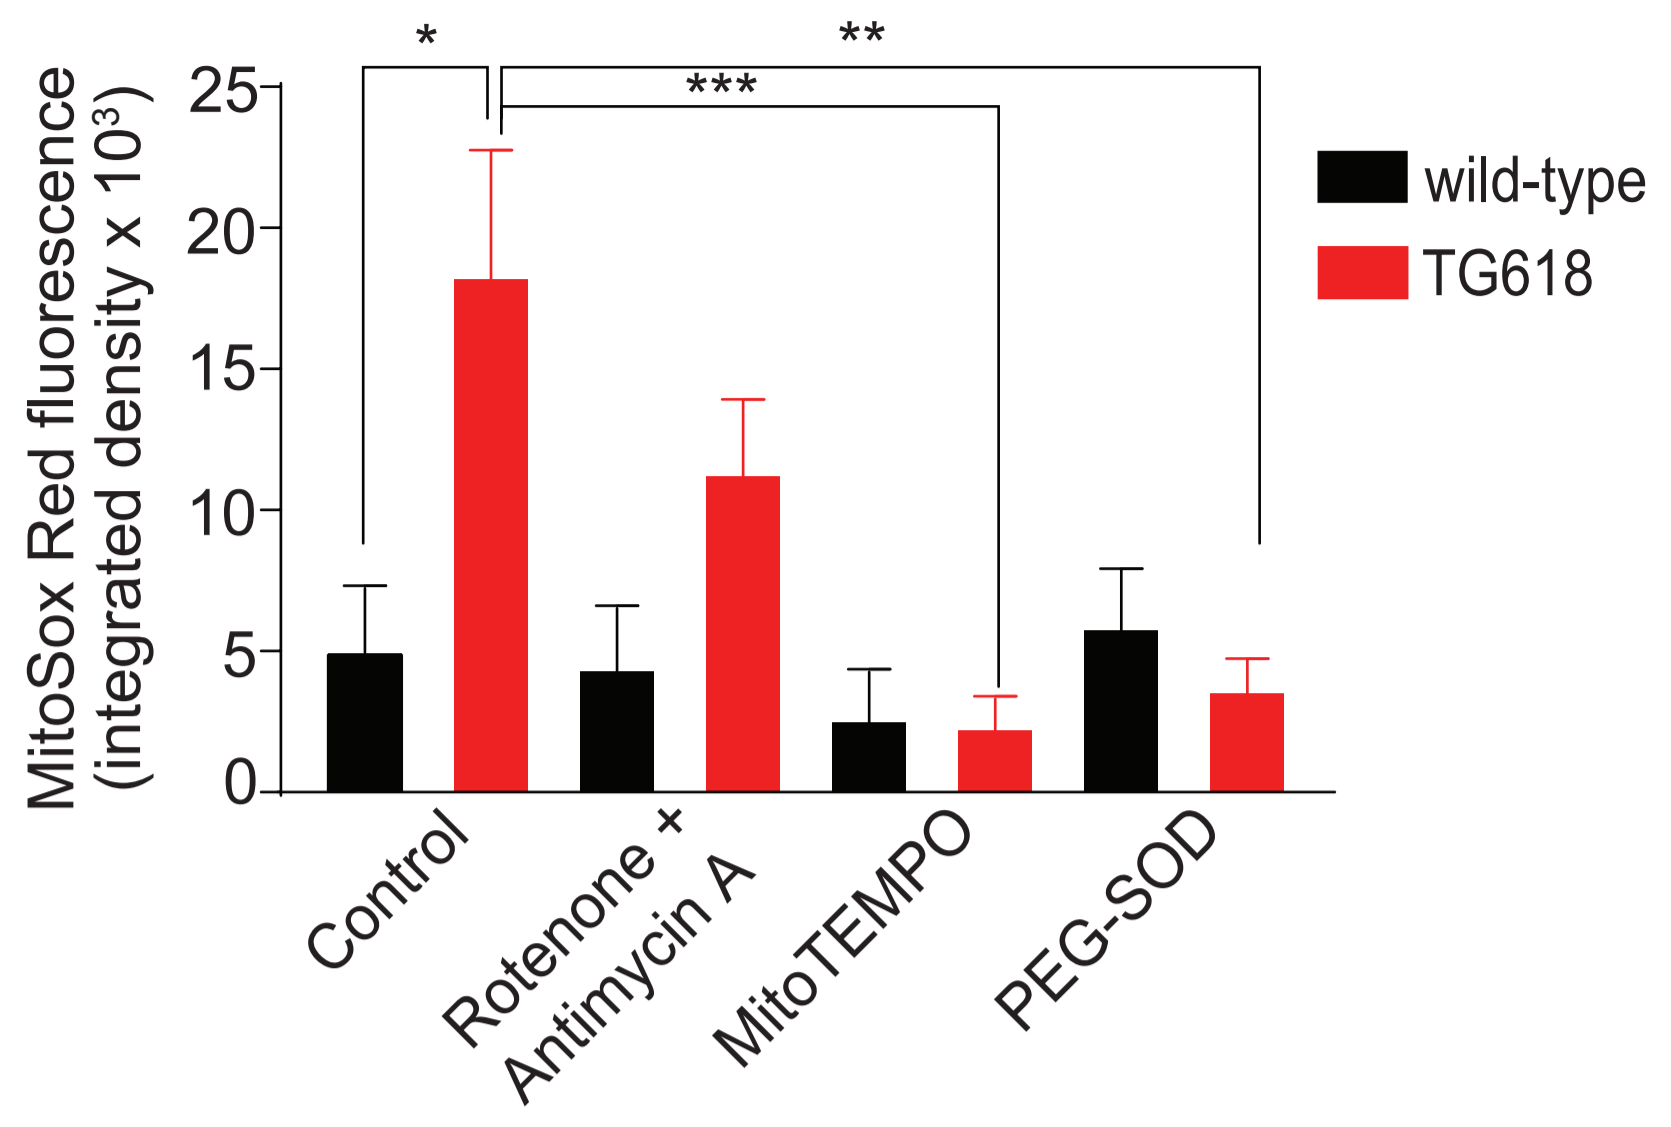

Supplement: mmc3.pdf [file mmc3.pdf]
